# Supplementary material for: Extracellular Vesicles Tropism: A Comparative Study between Passive Innate Tropism and the Active Engineered Targeting Capability of Lymphocyte-Derived EVs
Source: MDPI journal article supplement (doi:10.3390/membranes11110886), 2021-11-18
Supplement: s1 [file s1]

## Supporting Information

### Extracellular Vesicles Tropism: A Comparison study between Passive Innate tropism versus Active Engineered Targeting Capability of lymphocyte derived-EVs

Tania Limongi <sup>†, \*</sup>, Francesca Susa <sup>†</sup>, Bianca Dumontel, Luisa Racca, Michela Perrone Donnorso, Doriana Debellis, and Valentina Cauda<sup>\*</sup>

#### *Evidence of nEVs labelling*

The fluorescence microscope images of WGA-labelled nEVs are reported in Figure S.1, proving the labelling efficiency. nEvs were labelled with Wheat Germ Agglutinin, Alexa Fluor™ 488 Conjugate (WGA488, Thermo Fisher,  $\lambda_{ex}=495$  nm) as described in the Materials and Method section of the main manuscript in Section 2.5.

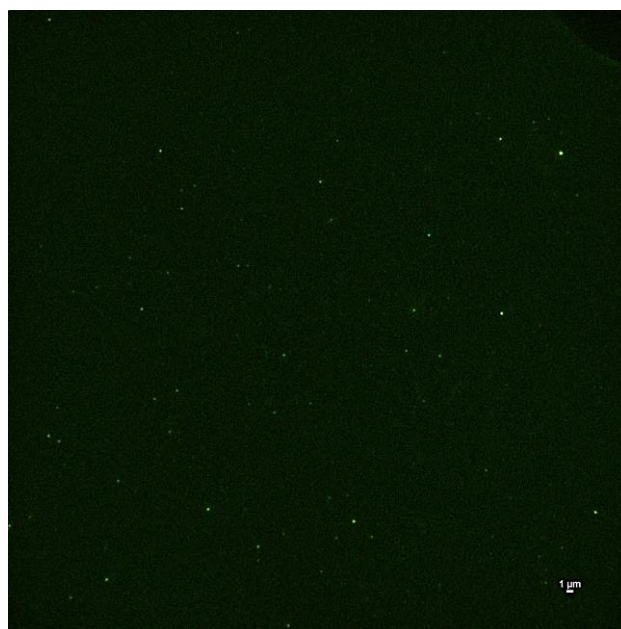

**Figure S1.** Fluorescence microscopy image on nEV labelled with WGA488, imaged in the green channel. Scale bar is 1  $\mu$ m.

### EVs<sup>CD20</sup> characterization

The EVs<sup>CD20</sup> characterization was performed also by fluorescence microscopy. Figure S2 reports an image of the EVs<sup>CD20</sup> nanoconstruct where the EVs are initially labelled with WGA488 ( $\lambda_{ex}=495$  nm) and then the EVs<sup>CD20</sup> labelled using a fluorescent anti-human secondary antibody (AMCA-AffiniPure F(ab')<sub>2</sub> Fragment Goat Anti-Human IgG, Fc $\gamma$  fragment specific) conjugated to coumarin dye ( $\lambda_{ex}=350$  nm). The sample is then imaged after depositing it on a microscope glass slide covered by a cover glass slip. The preparation method is described in Section 2.9 of the main paper.

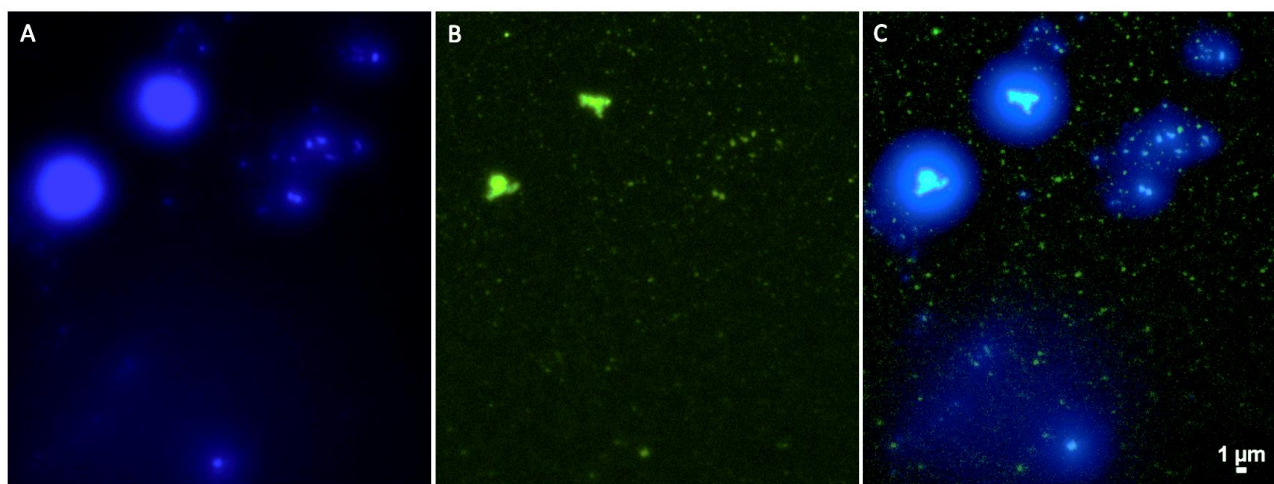

**Figure S2.** Fluorescence microscopy images of the **EVsCD20**. A is the blue channel of the secondary antibody of the antibody functionalization, B is the green channel of EVs' membranes and C is the merged image. Scale bar is 1  $\mu$ m and the same for each channel picture.
